# Supplementary material for: Dietary obesity-induced Egr-1 in adipocytes facilitates energy storage via suppression of FOXC2
Source: PubMed Central journal article supplement — Sci Rep. 2013 Mar 18;3:1476. doi: 10.1038/srep01476 (PMC3600596; doi:10.1038/srep01476), 2013-03-18
Supplement: srep01476-s1.pdf [file srep01476-s1.pdf]

## Supplementary Information

### Dietary obesity-induced Egr-1 in adipocytes facilitates energy storage via suppression of FOXC2

Jifeng Zhang<sup>1</sup>, Yuan Zhang<sup>2</sup>, Fang Guo<sup>3,4</sup>, Shengping Huang<sup>3</sup>, Tingwan Sun<sup>2</sup>, Menisha Chandalia<sup>5</sup>, Nicola Abate<sup>5</sup>, Daping Fan<sup>6</sup>, Hong-Bo Xin<sup>7</sup>, Y. Eugene Chen<sup>1\*</sup> and Mingui Fu<sup>2, 3\*</sup>

**Table S1. Real-time RT-PCR Primer Sequences**

| Gene Analyzed      | Accession number | QPCR Primer Sequences                                    |
|--------------------|------------------|----------------------------------------------------------|
| Human Egr-1        | NM_001964        | 5'gagcacctgaccgcagagt3'<br>5'ccagcaccttctcgttgttc3'      |
| Mouse Egr-1        | NM_007913        | 5'cgagcgaacaaccctatgag3'<br>5'cattattcagagcgatgtcagaaa3' |
| Mouse FOXC2        | NM_031519        | 5'gcttatggaccaaaccatagg3'<br>5'gcgcccgtggagaatct3'       |
| Mouse $\beta$ 1-AR | NM_007419        | 5'cgagctctggacttcggtaga3'<br>5'tgacacacagggtctcaatgc3'   |
| PGC-1 $\alpha$     | NM_008904        | 5'gactcagtgtcaccaccgaaa3'<br>5'tgaacgagagcgcacatcctt3'   |
| PGC-1 $\beta$      | NM_133249        | 5'gagggtccggcacttc3'<br>5'cgtacttgctttcccagatga3'        |
| UCP-1              | NM_009463        | 5'aagctgtgcatgtccatgt3'<br>5'aagccacaaacccttgaaaa3'      |

Figure S1, Zhang et al.

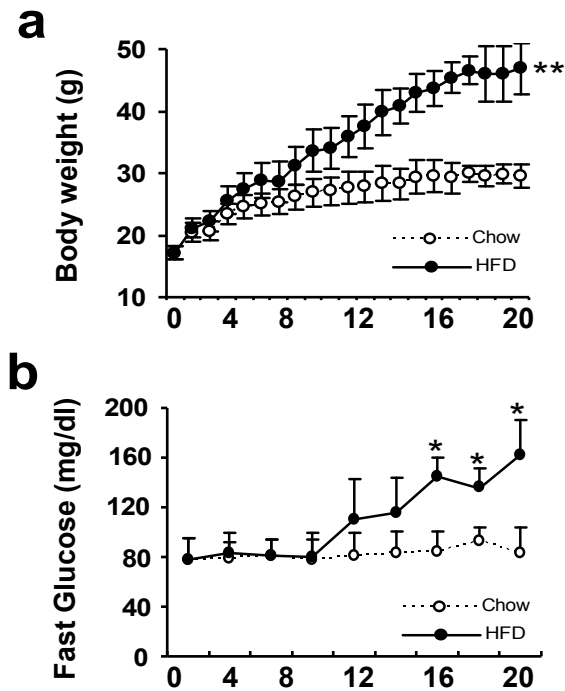

**Fig.S1. HFD-induced obesity and diabetes of mice.** C57BL/6J mice were purchased from Jackson laboratories and divided into two groups fed with chow-diet or high-fat diet, respectively. Body weight was recorded weekly (a) and fasted glucose level was recorded biweekly (b). Data represent mean $\pm$ SD, n=5. \*P<0.05, \*\*P<0.01 vs chow group.

Figure S2, Zhang et al.

**a**

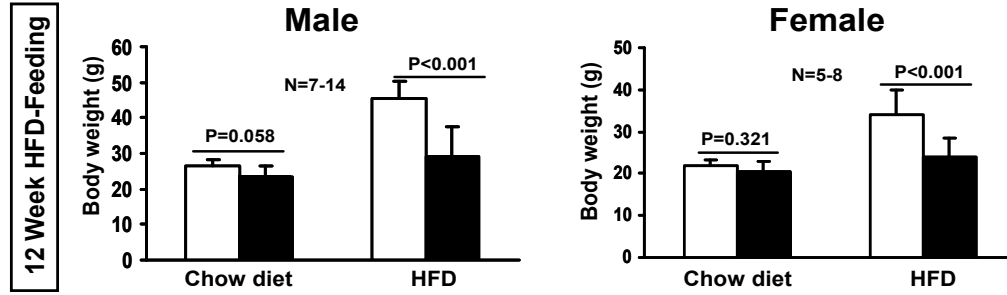

**b**

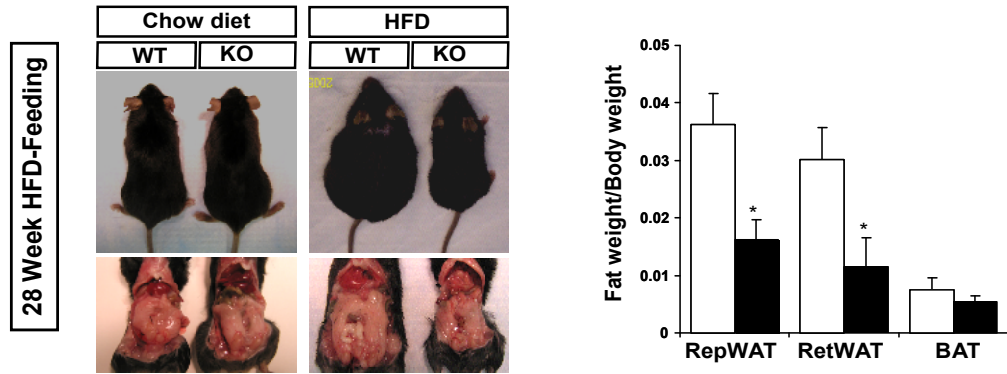

**Fig.S2. Both male and female of *Egr-1* null mice are resistant to diet-induced obesity.** **a)** Body weight was measured before high-fat feeding and after 12 weeks high-fat feeding for both male and female mice. **b)** Male, wild-type or *Egr-1*<sup>-/-</sup> mice were fed with chow or high-fat diet for 20 weeks. Appearance of mice was present on left; the weight ratio of reproductive fat pads, retroperitoneal fat pads and BAT to body weight was presented on right. white bar represent wild-type, black bar represent knockout mice. Data were presented as mean±SD, \*P<0.01 vs wild-type.

Figure S3, Zhang et al.

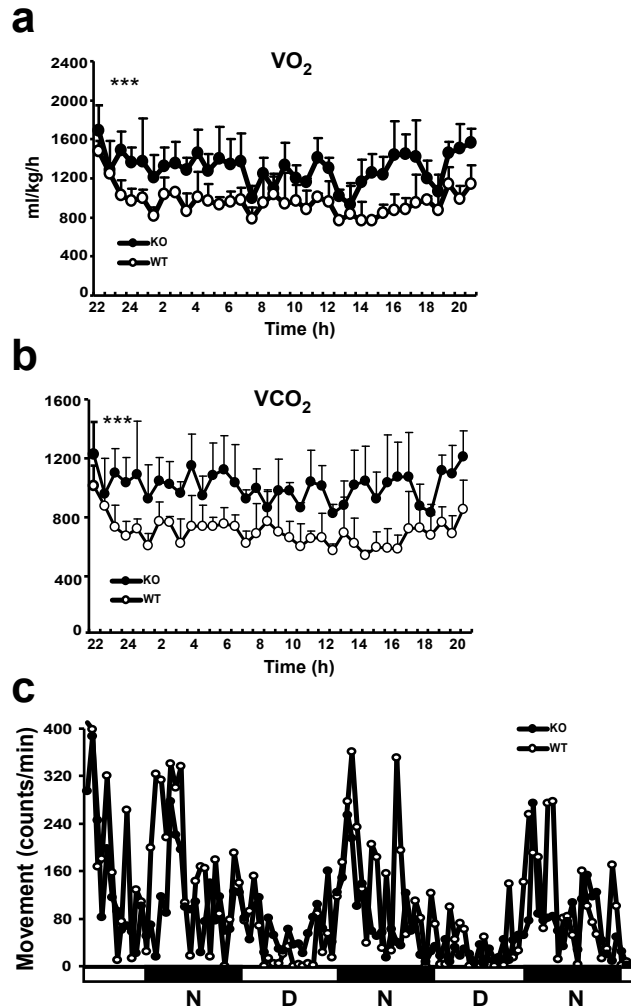

**Fig.S3. a & b)** Oxygen consumption (VO<sub>2</sub>) and carbon dioxide production (VCO<sub>2</sub>) were measured by metabolic cage system (CLAMS, Columbia Instrument) during a period of three days after 16 week of high-fat feeding (n=5). Values from 24 hrs were presented. Values are expressed as the mean±SD. (\*\*\*, P<0.001). **c)** Physical activity was measured with CLAMS. Representative trace of movement monitoring for high-fat fed mice over a period of 3 days

Figure S4, Zhang et al.

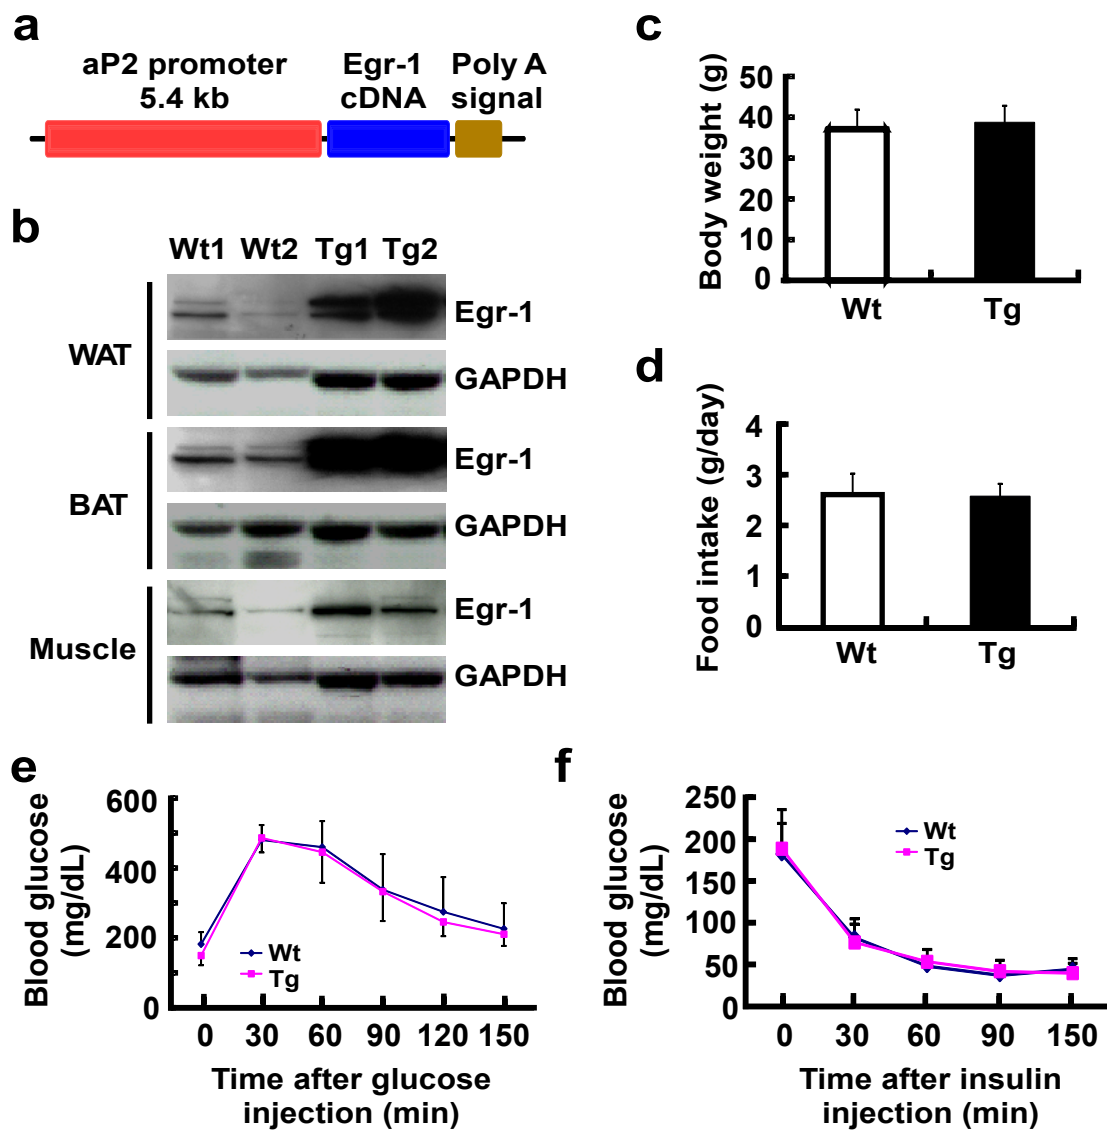

**Fig.S4. Overexpression of Egr-1 in adipose does not change the metabolic parameters.** **a)** Construct vector for generation of adipose-specific Egr-1 transgenic mice. aP2 promoter was used to drive rat Egr-1 cDNA expression in adipose tissues. **b)** Two lines of wild-type (Wt) and Egr-1 transgenic (Tg) mice were obtained and the Egr-1 expression in white adipose tissues (WAT), brown adipose tissues (BAT) and muscle were detected by western blot. GAPDH was served as loading control. **c&d)** Both body weight and food intake in adult, male wild-type and transgenic mice were measured.  $n=10$ . **e&f)** both glucose tolerance (GTT) and insulin tolerance (ITT) tests were performed by injection (i.p.) with 2 g/kg of glucose or 0.75 IU/kg of insulin. The blood glucose levels were recorded at indicated time after injection. Data were presented as mean $\pm$ SD,  $n=7$ .

Figure S5, Zhang et al.

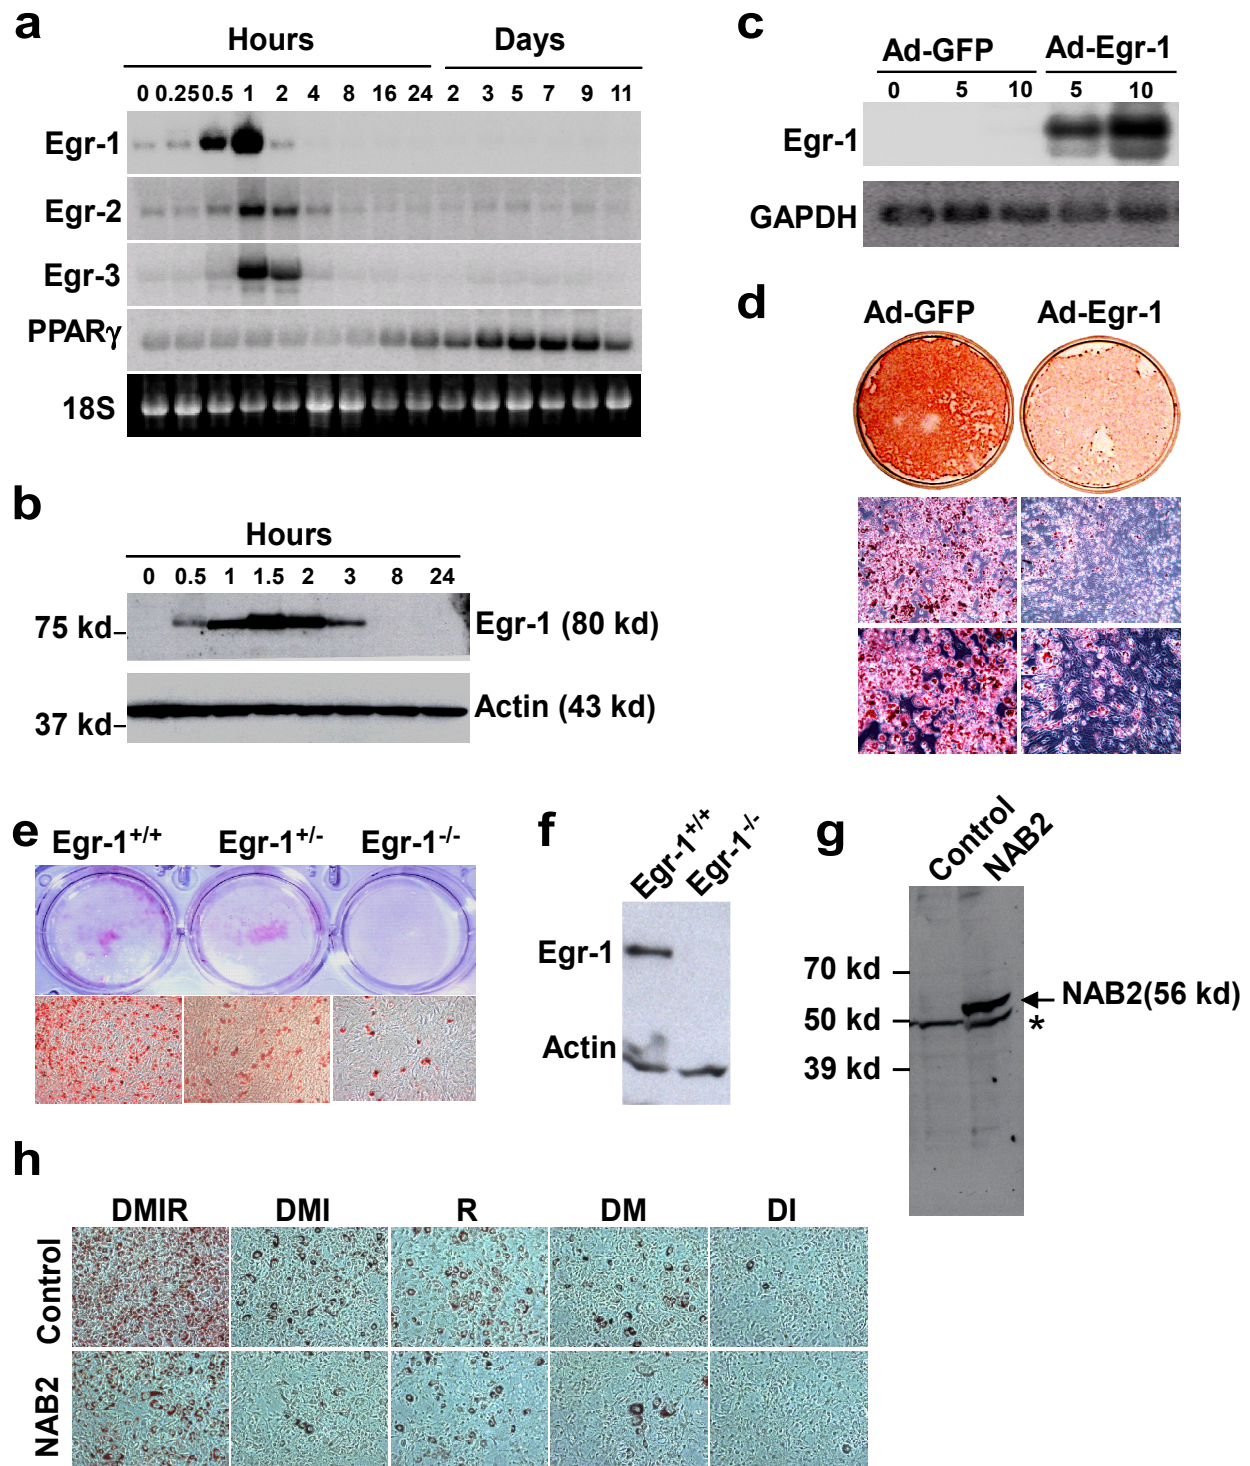

**Fig.S5. Transient expression of Egr-1 is required for 3T3-L1 adipogenesis.** **a)** Northern blot showed Egr-1, Egr-2 and Egr-3 were transient expressed during 3T3-L1 adipogenesis. PPAR $\gamma$  is a marker of adipogenesis. 18S was served as loading control. **b)** Western blot showed Egr-1 protein was also transient expressed during 3T3-L1 adipogenesis. **c&d)** Adenovirus infection-mediated sustained overexpression in 3T3-L1 cells reduced adipogenesis. Western blot confirmed adenovirus infection with 5, 10 MOI mediated overexpression of Egr-1 in 3T3-L1 cells. GAPDH was served as loading control (**c**). Adenovirus-infected 3T3-L1 cells were treated with DMI for 7 days and subjected to Oil O staining (**d**). **e)** Mouse embryonic fibroblasts isolated from Egr-1<sup>+/+</sup>, Egr-1<sup>+/-</sup> and Egr-1<sup>-/-</sup> mice were induced with DMI for 9 days and subjected to Oil O staining. **f)** Western blot confirmed Egr-1 is not expressed in the MEFs from Egr-1<sup>-/-</sup> mice. Actin was served as loading control. **g&h)** NAB2 (a Egr-1 inhibitor) stable cell line and control 3T3-L1 cell line were induced by different combinations of inducer (D: dexamethasone; M: IBMX; I: insulin; R: rosiglitazone) for 7 days and subjected Oil O staining. Overexpression of NAB2 was confirmed by Western blot (**g**). All experiments were repeated three times and showed similar results.
